# Supplementary material for: Facile preparation of water-dispersible graphene sheets stabilized by acid-treated multi-walled carbon nanotubes and their poly(vinyl alcohol) composites
Source: Royal Society of Chemistry journal article supplement (doi:10.1039/c1jm13921e), 2011-12-23
Supplement: c1jm13921e.pdf [file c1jm13921e.pdf]

**Facile preparation of water-dispersible graphene sheets  
stabilized by acid-treated multi-walled carbon nanotubes and  
their poly(vinyl alcohol) composites**

**Chao Zhang,<sup>a</sup> Shu Hang,<sup>a</sup> Weng Weei Tjiu,<sup>b</sup> Wei Fan,<sup>a</sup> and Tianxi Liu<sup>a,\*</sup>**

Electronic Supplementary Information

**Figure S1.** AFM image and height profile of exfoliated GO sheets.

**Figure S2.** TEM images of the p-CNTs.

**Figure S3.** TEM images of the t-CNTs.

**Figure S4.** TGA curves of GO sheets, r-GO sheets, p-CNTs, t-CNTs, and G-CNT hybrids.

**Figure S5.** TGA curves of neat PVA, PVA/CNT and PVA/(G-CNT) composite films.

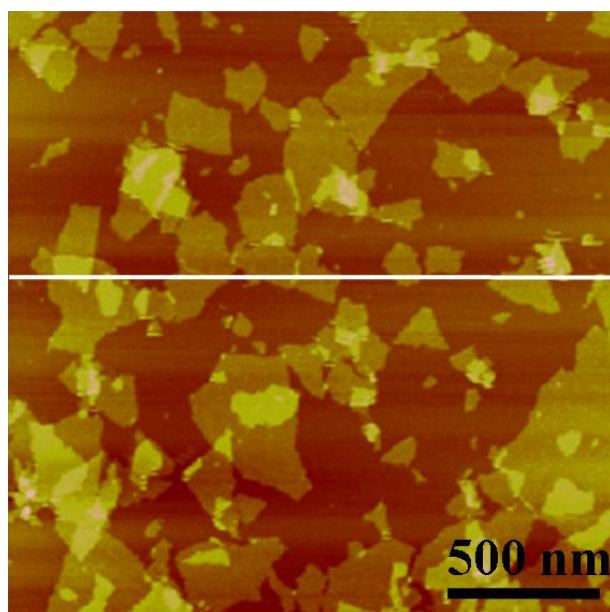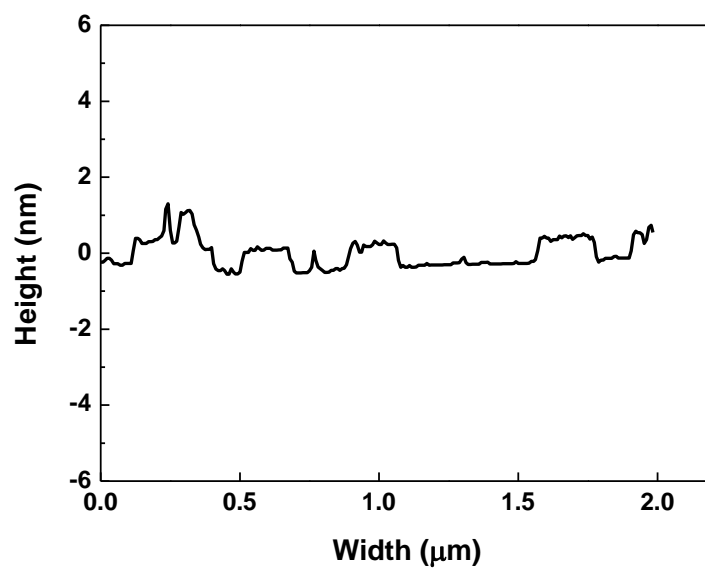

**Figure S1**

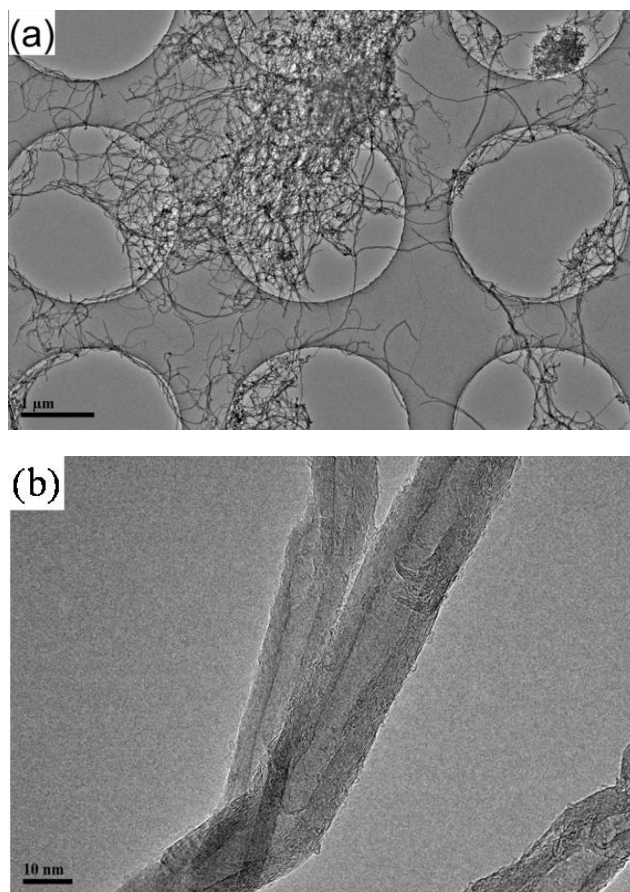

**Figure S2**

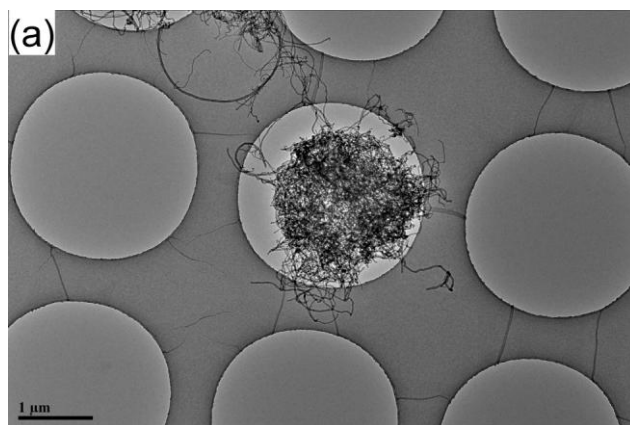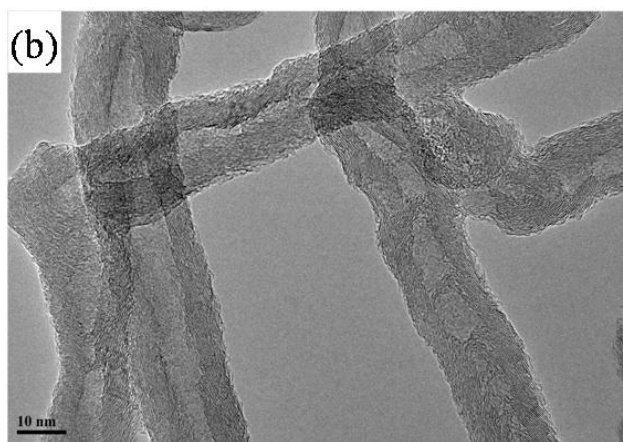

**Figure S3**

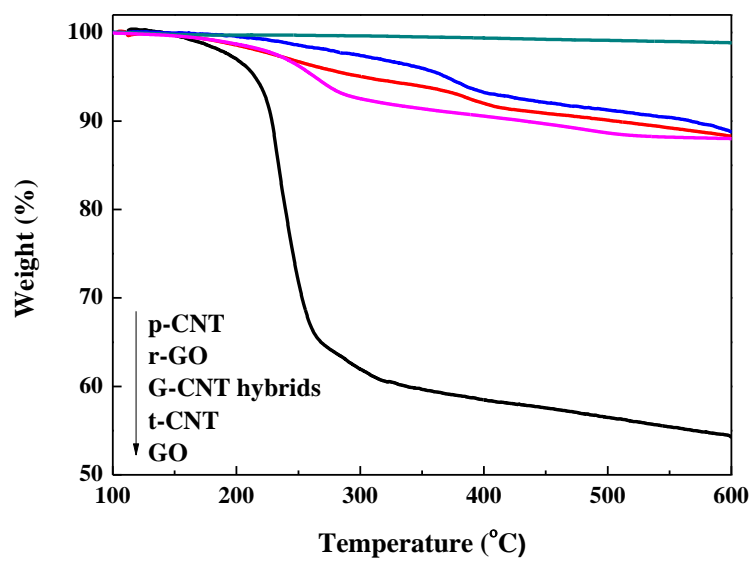

Figure S4

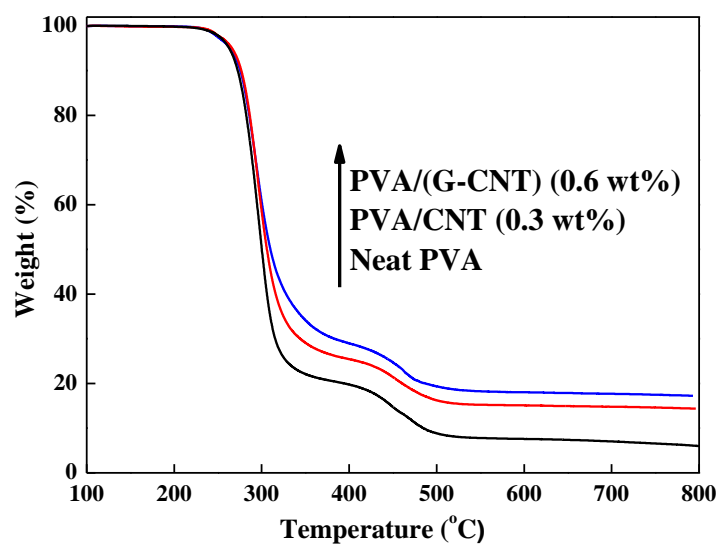

Figure S5
